# Supplementary material
Source: PubMed Central journal article supplement (PMC3488098)

## SUPPLEMENTAL DATA

### SUPPLEMENTAL EXPERIMENTAL PROCEDURES

*Apoptosis assay*—Ncoa3 knockdown or control ESCs and day 2 EB cells were stained with fluorescein isothiocyanate (FITC)-Annexin V and propidium iodide (PI) simultaneously, followed by data collection using a BD FACSCalibur and data analyzation with the Cellquest software (BD).

**Table S1: Primers for gene expression analysis**

| Gene           | Forward primer            | Reverse primer            |
|----------------|---------------------------|---------------------------|
| <i>β-Actin</i> | CAGAAGGAGATTACTGCTCTGGCT  | TACTCCTGCTTGCTGATCCACATC  |
| <i>Ncoa3</i>   | GCCTGGCTTTGAAGACATAATCCG  | TCTTGATAGTGACGCTTCTGGGAC  |
| <i>Nanog</i>   | TACAAGGGTCTGCTACTGAGATGC  | TTGGGACTGGTAGAAGAATCAGGG  |
| <i>Oct4</i>    | ATCAGCTTGGGCTAGAGAAGGATG  | AAAGGTGTCCCTGTAGCCTCATAAC |
| <i>Sox2</i>    | GCGGAGTGGAACTTTTGTCC      | CGGGAAGCGTGTACTTATCCTT    |
| <i>Klf4</i>    | AGCCACCCACACTTGTGACTAT    | AGTGGTAAGGTTTCTCGCCTGT    |
| <i>Nestin</i>  | CTGGATCTGGAAGTCAACAGAGGT  | ATCCTCAGTTTCCACTCCTGTAGC  |
| <i>Pax6</i>    | TAACGGAGAAGACTCGGATGAAGC  | GGCAAACACATCTGGATAATGGG   |
| <i>Gata4</i>   | GCTATGCATCTCCTGTCACTCAGA  | CCAAGTCCGAGCAGGAATTTGAAG  |
| <i>Gata6</i>   | CTTCTCCTTCTACACAAGCGACCA  | ATACTTGAGGTCCTGTTCTCGGG   |
| <i>Sox17</i>   | CCCAACACTCCTCCCAAAGTATCT  | TCTCTGTCTTCCCTGTCTTGGTTG  |
| <i>Hand1</i>   | AAGGATGCACAAGCAGGTGAC     | TTAATCCTCTTCTCGCCGGG      |
| <i>Nkx2.5</i>  | ACTATGCCCTGTCCCTCAGATTTTC | TCCTAGTGTGGAATCCGTCGAAAG  |
| <i>T</i>       | CATCGGAACAGCTCTCCAACCTAT  | TACCATTGCTCACAGACCAGAGAC  |
| <i>Flk1</i>    | CAGGAAACTACACGGTCATCCTCA  | AGGAATCCATAGGCGAGATCAAGG  |
| <i>Bmp4</i>    | ACAGCGGTCCAGGAAGAAGAAT    | TGCACAATGGCATGGTTGGT      |
| <i>Cdx2</i>    | CAGTCCCTAGGAAGCCAAGTGAAA  | AAGTGAAACTCCTTCTCCAGCTCC  |

**Table S2: Primers for ChIP analysis**

| Gene         | Forward primer             | Reverse primer            |
|--------------|----------------------------|---------------------------|
| <i>Oct4</i>  | GCCATTCAAGGGTTGAGTACTTG    | GACAATGGCCTTGCTGGACAAT    |
| <i>ActB</i>  | CGTGTGACAAAGCTAATGAGGCTG   | CTAAGTTCAGTGTGCTGGGAGTCT  |
| <i>Nanog</i> | GGATGTCTTTAGATCAGAGGATGCCC | CAGGGTCCACCATGGACATTGTAA  |
| <i>Sox2</i>  | GCGAGTGGTTAAACAGAGCTTTCC   | CCTTATGGAAATGAAGGCCGAACGG |

**Table S3: 19-nt targeting sequences for shRNAs**

| Gene          | Sequences           |
|---------------|---------------------|
| <i>shGFP</i>  | GAACGGCATCAAGGTGAAC |
| <i>shN1-1</i> | CCGACAACAGCGACAACAG |
| <i>shN1-2</i> | AAGAAACGATGAGAAGGCC |
| <i>shN1-3</i> | ACCAGCCCTTTCTCTCAAC |
| <i>shN2-1</i> | GCGAGCAGGAGAATAAGTA |
| <i>shN2-2</i> | AGTCCTCGCATCCCACCCA |
| <i>shN2-3</i> | CAGCGGCCAAATTACACCA |
| <i>shN3-1</i> | GTGTGTCAGTCAAACAGCA |
| <i>shN3-2</i> | GTGAGACCAAGGACCAACA |
| <i>shN3-3</i> | TCTGGCCAAGAGAAAGACC |
| <i>shEs-1</i> | GATTCGATGTACATTGAGA |

|                |                     |
|----------------|---------------------|
| <i>shEs-2</i>  | GTGGATGCTCCTGCTAGAG |
| <i>shNr5-1</i> | GCAAGTGTCTCAATTTAAA |
| <i>shNr5-2</i> | GCAGAAGACTACCTGTACT |

## SUPPLEMENTAL FIGURE LEGENDS

**Figure S1.** The expression levels of differential markers in shGFP control and stable Ncoa3 knockdown ESCs and EBs. RNA samples purified from shGFP control and stable Ncoa3 knockdown ESCs (day 0) and EBs (day 2) were subjected to quantitative RT-PCR. Averages and standard deviations from three independent experiments are plotted. \*,  $p < 0.05$ ; \*\*,  $p < 0.01$ .

**Figure S2.** Cell death analysis of shGFP control and stable Ncoa3 knockdown ESCs and day 2 EBs. shGFP control and stable Ncoa3 knockdown ESCs and day 2 EBs were stained with Annexin V and PI, followed by flow-cytometry analysis. A representative plot was shown for each condition. The numbers in up-right and lower-right panels are the percentage of necrotic and apoptotic cells (averages and standard deviations from three independent experiments), respective.

**Figure S3. WT and mutant Ncoa3 are expressed at a similar level.** (A) Ncoa3 mRNA expression in V6.5 ESCs described in Figure 6A was measured by quantitative RT-PCR. Averages and standard deviations from three independent experiments are plotted. (B) Ncoa3 protein levels in V6.5 ESCs described in Figure 6A were detected by Western blot. The  $\Delta N$  (133 kDa) and  $\Delta C$  (156 kDa) mutants could not be separated from the endogenous WT Ncoa3 (the upper band marked with a triangle). The  $\Delta AD$  (104 kDa) and  $\Delta NRID$  (118 kDa) mutants moved faster in the gel (the lower band pointed by an arrow). A fast moving band was also detected in the cells expressing the  $\Delta C$  mutant. This might be caused by protein degradation. Quantification results of Western blot were shown below corresponding bands as average  $\pm$  standard deviation ( $n=3$ ). For  $\Delta AD$ ,  $\Delta C$  and  $\Delta NRID$ , the expression value is the sum of two bands.

Figure S1

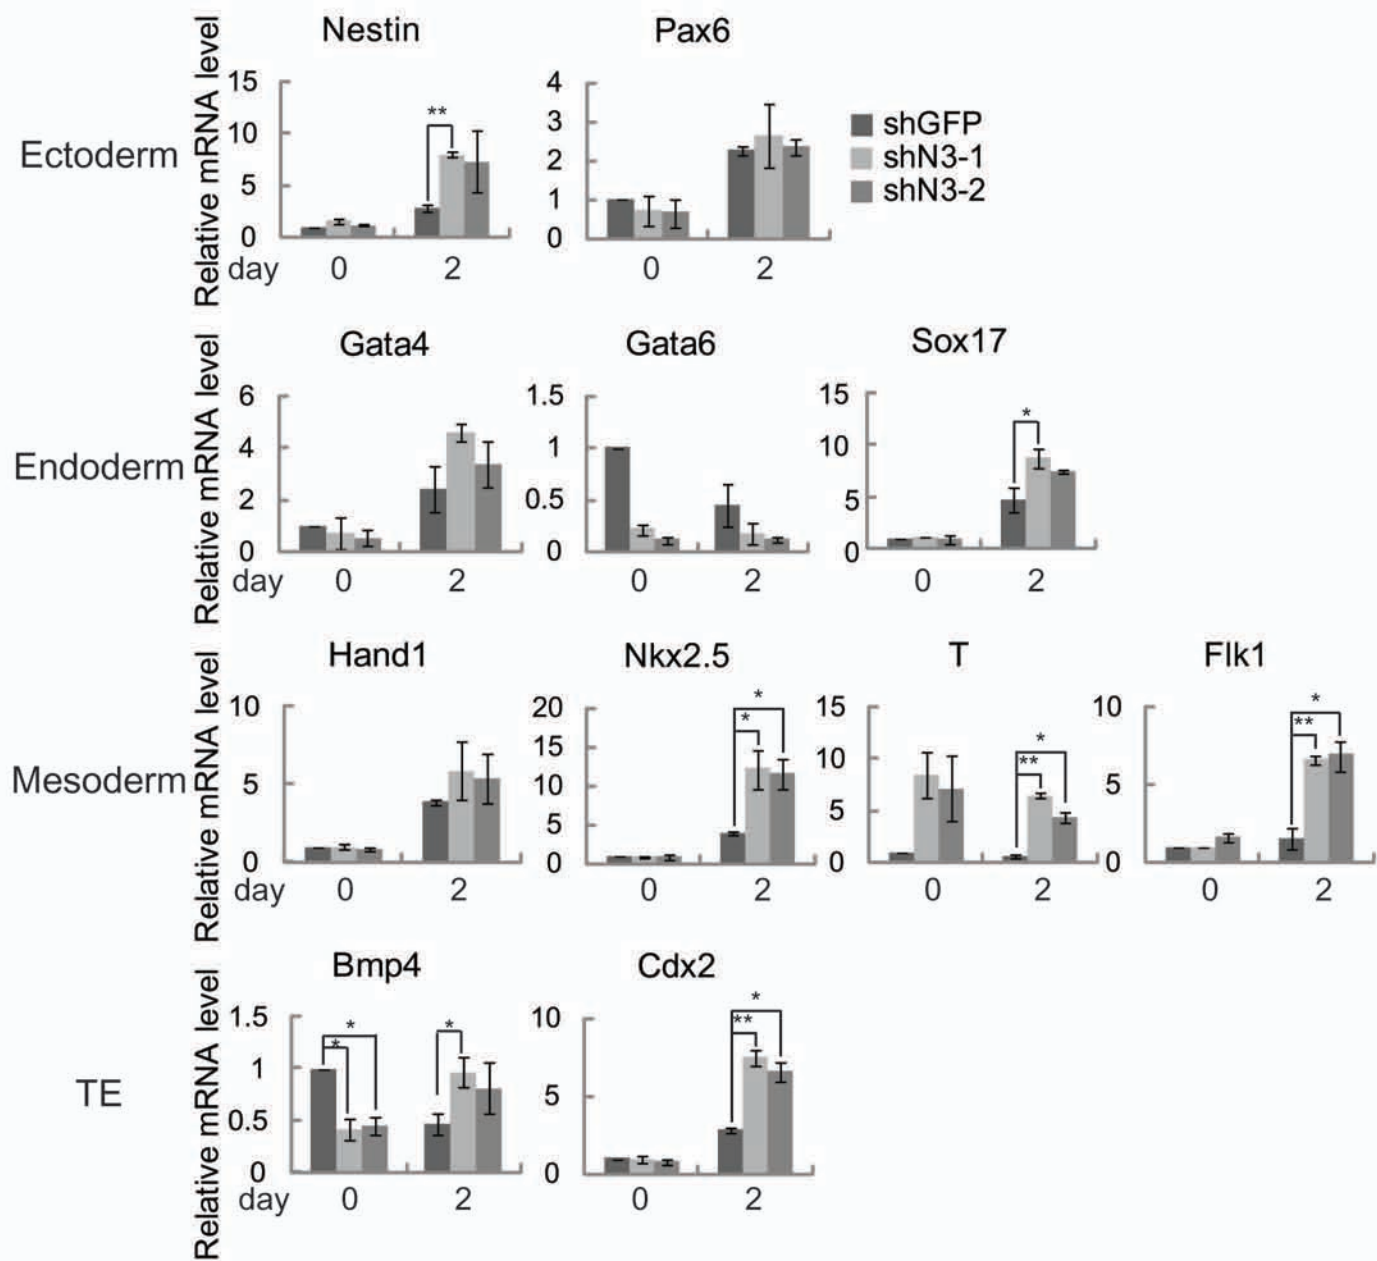

Figure S2

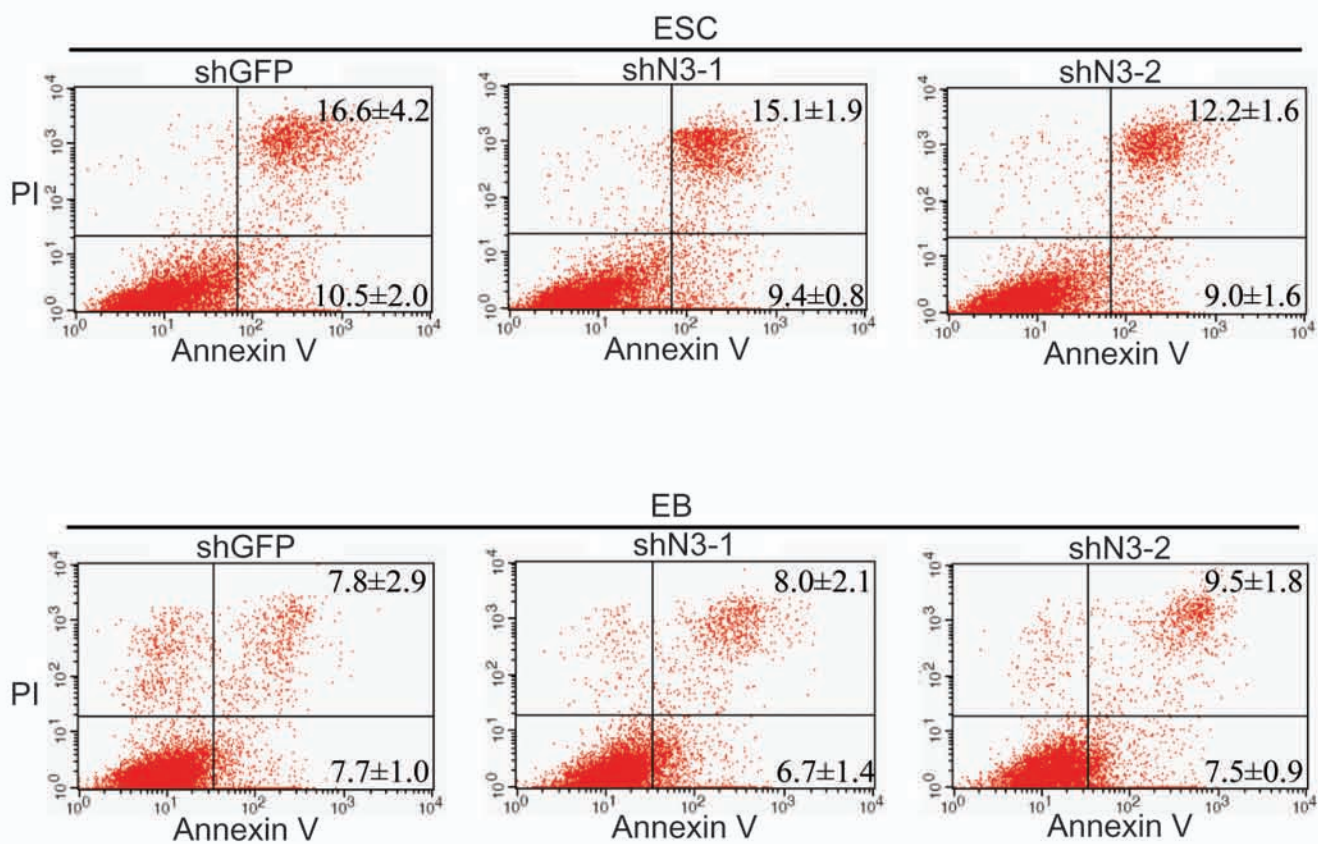

Figure S3

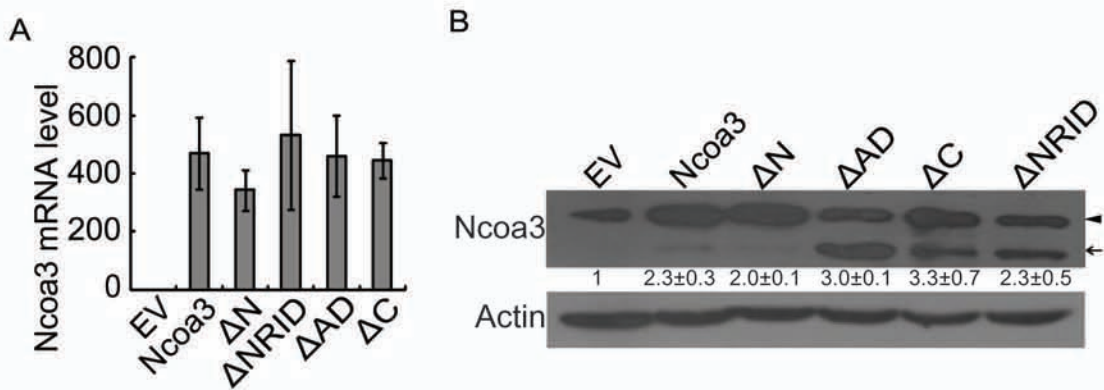

Supplement: supp_M112.373092_jbc.M112.373092-1.pdf [file supp_M112.373092_jbc.M112.373092-1.pdf]
